# Supplementary material
Source: ML conference proceedings conference paper supplement (https://openreview.net/forum?id=cU5W9Z3r8p)
Supplement: supplementary_material [file attachment]

---

## World Central Banks (Supplementary Material)

---

**Kaggle Dataset:**  
<https://www.kaggle.com/datasets/gtfintechlab/wcb-dataset-annotated/data>

**Website:**  
<https://gcb-web-bb21b.web.app/>

### Kaggle

Publishing our dataset on Kaggle offers distinct advantages over platforms like HuggingFace, particularly in terms of usability and community engagement. Kaggle provides integrated tools for data visualization, version control, and collaborative discussion, streamlining the research workflow. Its active community of data practitioners fosters faster feedback and broader adoption. Unlike HuggingFace, which is primarily model-focused, Kaggle is optimized for dataset-driven experimentation, making it a more practical platform for sharing, validating, and improving data-centric work. Hosting the dataset on Kaggle thus ensures greater transparency, accessibility, and impact across both academic and applied research communities.

### Website

Our World Central Banks website offers a structured and accessible overview of our research. It features a task-specific model leaderboard with direct links to download and explore the best performing model. The site includes comprehensive dataset statistics and benchmark results to support evaluation and comparison. Each central bank has an individual page outlining its monetary policy, along with visualizations of hawkishness measures and inflation trends over time. While AI researchers and data scientists may focus on model performance and raw data, finance and economics professionals may find the time series hawkishness measures more relevant. For these users, we provide the ability to download these measures directly, providing a simple and efficient way to access and analyze the information.
